# Supplementary material for: Determination of tryptophan and tyrosine by chemiluminescence based on a luminol–N-bromosuccinimide–ZnS quantum dots system
Source: Royal Society of Chemistry journal article supplement (doi:10.1039/c5ra07233f), 2015-01-01
Supplement: c5ra07233f1.pdf [file c5ra07233f1.pdf]

# **Determination of tryptophan and tyrosine by chemiluminescence based on luminol-N-bromosuccinimide-ZnS quantum dots system**

**Shifeng Li\*, Min Xing, Haiyan Wang, Li Zhang, Yiman Zhong, Lei Chen**

The Key Laboratory of Functional Molecular Solids, Ministry of Education, College of Chemistry and Materials Science, Anhui Normal University, Wuhu 241000, China

## **Supporting information**

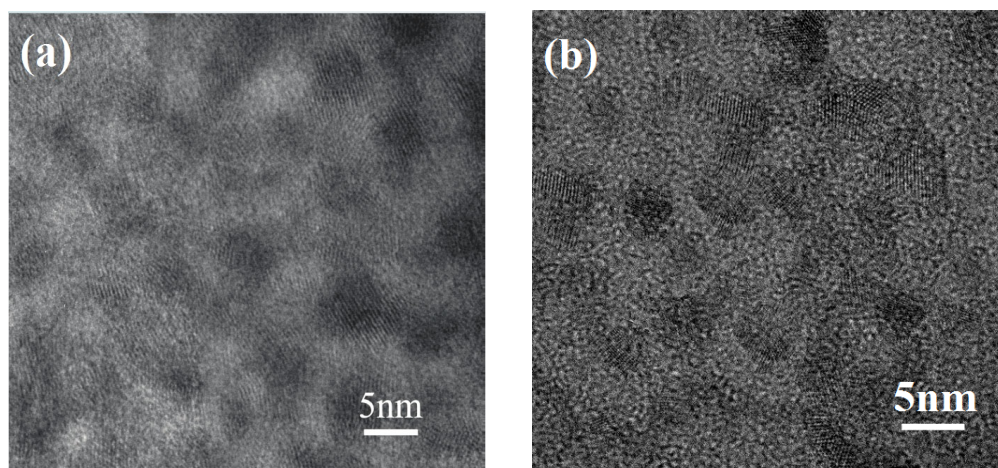

Fig.S1 (a) TEM of the TGA/ZnS QD , (b)TEM of the L-Cys/ZnS QDs.

---

The Key Laboratory of Functional Molecular Solids, Ministry of Education, College of Chemistry and Materials Science, Anhui Normal University, Wuhu 241000, China  
Fax: (+86) 13605536845; E-mail: [lsf2008@mail.ahnu.edu.cn](mailto:lsf2008@mail.ahnu.edu.cn).
